# Supplementary material for: Value-based healthcare in Latin America: a survey of 70 healthcare provider organisations from Argentina, Brazil, Chile, Colombia and Mexico
Source: HighWire-hosted journal article supplement (doi:10.1136/bmjopen-2021-058198), 2022-06-01
Supplement: bmjopen-2021-058198supp001_data_supplement.pdf [file bmjopen-2021-058198supp001_data_supplement.pdf]

## **Value-Based Health Care in Latin America: A Survey of 70 Healthcare Provider Organizations from Argentina, Brazil, Chile, Colombia and Mexico**

### **Appendix A. List of Healthcare Provider Organizations that participated in the study:**

Argentina: Miguel Angel Silva, Willen Cabrera (Sanatorio Finochietto); Jorge Lantos (Sanatorio de los Arcos); Mariano Benzaón (Instituto Cardiovascular de Buenos Aires – ICBA); Hernán Michelángelo (Hospital Italiano de Buenos Aires); Pablo Alejandro Lemos (Hospital Privado Universitario de Córdoba); Jose Luis Puiggari (Hospital Universitario Austral); Silvio Javier Payaslian (Clínica Zabala - Swiss Medical Group); Javier Agustin Sala-Mercado (Instituto Modelo de Cardiología Privado S.R.L.); Matias Fosco (Hospital Universitario Fundación Favaloro).

Brazil: Otavio Celso Eluf Gebara; Camila Succi (Hospital Santa Paula); Miguel Cendoroglo Neto (Hospital Israelita Albert Einstein); Camila Sardenberg (Hospital Santa Catarina); Fabiana Rolla (Hospital Municipal Dr. Moysés Deutsch e Hospital Municipal Dr. Gilson de Cassia Marques de Carvalho - Vila Santa Catarina); Eloisa Silva Dutra de Oliveira Bonfá, Michelle Ugolini, Ingrid Magatti (Hospital das Clínicas-Faculdade de Medicina da Universidade de São Paulo-HC-FMUSP); Fernando Colombari (Hospital Alvorada Moema); Ricardo Prates Periard (Hospital Samaritano Botafogo); Diogo Porto Dias (Hospital Porto Dias); Antonio Tonete Bafi (Hospital Sepaco); Osni Silvestri (Hospital Vita Curitiba); Ir. Monique Bourget (Casa de Saude Santa Marcelina); Paulo César

Santos Dias (Complexo Hospitalar de Niterói); Humberto Bolognini Tridapalli (Hospital Santa Catarina de Blumenau); Fábio Araújo Motta (Hospital Pequeno Príncipe da Associação Hospitalar de Proteção à Infância Dr. Raul Carneiro); Daniela Falqueto (Alvim Hospital Santa Clara); Walter Amauchi, Cibele Quaranta (Beneficência Nipo Brasileira de São Paulo); Fabio Katayama (Hospital Samaritano de São Paulo); Ary Costa Ribeiro, Sabrina Bernardez (Hospital do Coração-HCor); Luiz Eduardo Loureiro Bettarello (Hospital Beneficência Portuguesa de São Paulo e Hospital BP Mirante); José Roberto Ferraro, Nelson Akamine (Hospital São Paulo - SPDM – Universidade Federal de São Paulo-Unifesp); Antonio da Silva Bastos Neto, Ícaro Boszczowski (Hospital Alemão Oswaldo Cruz); Gisele Nader (Hospital Moinhos de Vento); Erickson Blun, Fábio Gonçalves (Hospital Vera Cruz S/A); Monica Cypriano (GRAACC - Instituto de Oncologia Pediátrica- Universidade Federal de São Paulo-Unifesp); Adriana Blanco, Claudio Enrique Lubascher (Hospital Santa Cruz); Daniella Lins Neves (AACD-Associação de Assistência à Criança Deficiente); Eduardo Darzé (Hospital Córdio Pulmonar); Guilherme Espírito Santo (Hospital Primavera); Felipe Salvador Ligório (Hospital Mater Dei Contorno-Rede Mater Dei de Saúde); Alfonso Migliore Neto, Ana Paula Mikulenas (Hospital Nove de Julho (Rede Impar Serviços Hospitalares S.A); Oswaldo Luis Balparda (Irmandade da Santa Casa de Misericórdia de Porto Alegre); Pedro Palocci, Fábio Gonçalves (Hospital Sao Lucas de Ribeirão Preto); Soraia Accioly (Santa Casa da Bahia / Hospital Santa Izabel); Rogerio Quintela Piroto (Hospital alemão Oswaldo Cruz - Unidade Vergueiro); Pedro Silva Correa de Magalhães (Hospital Municipal São José –

Joinville); Alexandre M. M. Ribeiro (Hospital Santa Isabel I Santa Casa de São Paulo); Ronaldo Fernandes Rosa (Santa Casa de São Paulo).

Chile: Bernd Oberpaur Wilkens, Paula Ithurbisquy (Clínica Alemana de Santiago); Alonso Rodriguez Rioseco (Clínica San Carlos de Apoquindo-Red de Salud UC-Christus).

Colombia: Victor Raul Castillo M. (Fundacion Cardiovascular de Colombia-HIC-ICV); Luis Antonio Mueses Coral (Hospital Universitario Departamental de Nariño); Luisa Fernanda Salgado Pilonieta (Hospital Universitario San Ignacio); Monica Patricia Arango Salas, Ana María Jaramillo Cardona (Inversiones Medicas de Antioquia S.A Clinica las Vegas); María Victoria Restrepo Ceballos (Hospital Pablo Tobon Uribe); Jesús Eugenio Bustamante Cano, Katherine Madrid Restrepo (Empresa Social del Estado Hospital General de Medellín "Luz Castro de Gutierrez); Orlando Jaramillo (Corporación Hospitalaria Juan Ciudad – Méderi); Ana Maria de la Hoz Bradford (Instituto Roosevelt); Wilmar Alonso Alcaraz Otalvaro, Carlos Alberto Restrepo Molina (Clínica Universitaria Bolivariana); Juan Guillermo Ortiz, Hermencia Carolina Aponte Murcia (Clínica Universidad de La Sabana); Marcela Granados Sánchez (Fundación Valle del Lili); Diana Ximena Castañeda (Centro Médico Imbanaco S.A.); Lina María Lopez Barreto (Fundación Hospital Infantil Los Angeles); Paola Sanchez Zapata, Mauricio Tamayo Palacio (Clínica Cardio VID); Edwin Harvey Etayi Ruiz (Gesencro SAS / Clínica de Alta Complejidad Santa Bárbara SAS)

Mexico: Alejandro Alfonso Diaz, Reyna Yacamán Handal (Centro Médico ABC - The American British Cowdray Medical Center IAP); Eduardo Martiniano Loya Cortés, Georgina Herrera Martínez (Hospital Galenia); Cinthya Zahidaly Castro González

(Hospital San José TecSalud); Javier Salvador Hernández Cruz (Hospital Zambrano Hellion TecSalud); Octavio González–Chon (Médica Sur S.A.B. de C.V.).

## Appendix B. Flow Diagram of Participating Organizations Selection

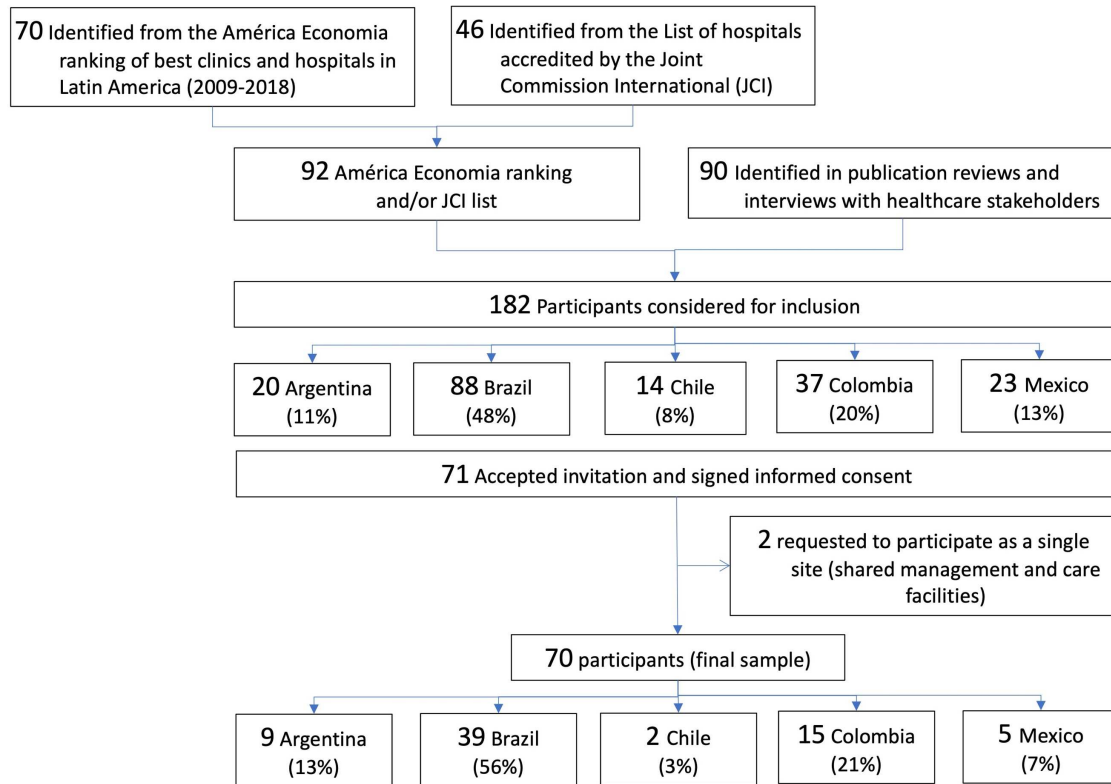

### Appendix C. Online Questionnaire (translated English version)

(Q01) Country

Argentina Brazil Chile Colombia Mexico

Organizational profile

(Q02) Name:

(Q03) Type: Public Private Public, teaching Private, teaching

(Q04) For-profit: Yes No

Respondent profile

(Q05) Name and surname:

(Q06) Position:

(Q07) E-mail:

(Q08) Telephone: ( )

Hospital in numbers

(Q09) Number of beds:

(Q10) Number of hospital discharges (previous year):

(Q11) Number of registered physicians:

About the implementation of the Value agenda core elements at your organization

(Q12) How is care delivery organized around medical conditions?

- a. Care pathways that organize care delivery for the full cycle or episode of care are implemented for several medical conditions (including pre-hospital, admission, post-acute care, patient education, etc).
- b. Care pathways that organize care delivery for the full cycle or episode of care are implemented for at least one medical condition (including pre-hospital, admission, post-acute care, patient education, etc).
- c. Care pathways that organize care delivery but do not cover the full cycle or episode of care are implemented (inpatient care only)
- d. Evidence-based clinical guidelines that guide clinical practice are implemented.
- e. Evidence-based clinical guidelines that guide clinical practice are not implemented.

(Q13) How are outcomes measured and analyzed?

- a. Clinical outcomes (eg, mortality, complications, readmissions), patient-reported outcomes (eg, quality of life, functional ability) and patient experience (eg, NPS, satisfaction) are measured for several medical conditions, and outcomes are incorporated into the electronic medical record, used during medical consultations, to give feedback to the care team and published in the internet.
- b. Clinical outcomes (eg, mortality, complications, readmissions), patient-reported outcomes (eg, quality of life, functional ability) and patient experience (eg, NPS, satisfaction) are measured for several medical conditions, and outcomes are used to give feedback to the care team or published in the internet, however they are not routinely available to the medical team during consultations.

- c. Clinical outcomes (eg, mortality, complications, readmissions), patient-reported outcomes (eg, quality of life, functional ability) and patient experience (eg, NPS, satisfaction) are measured for some medical conditions, but are not available to give feedback to the care team or published in the internet.
- d. Only clinical outcomes (eg, mortality, complications, readmissions) are measured and pilot projects are underway to measure patient-reported outcomes and experience for some clinical conditions.
- e. Only clinical outcomes (eg, mortality, complications, readmissions) are measured.

(Q14) How are costs measured and analyzed at the condition level?

- a. Costs are measured at the medical condition level for a full cycle or episode of care and data are used for decision making and to design value-based payment models.
- b. Costs are measured at the medical condition level but do not cover the full cycle or episode of care, although data are used for decision making and to design value-based payment models.
- c. Pilots are underway to measure costs at the medical condition level.
- d. Costs are measured at the level of services or departments.
- e. A structured system for cost measurement on a routine basis is not available.

(Q15) How is the adoption of new payment models?

- a. Alternative payment models, including population-based contracting, with part of payment linked to outcomes, are implemented, and contribute to revenue.
- b. Alternative payment models, including condition or episode-based contracting, with part of payment linked to outcomes, are implemented, and contribute to revenue.
- c. Alternative payment models for certain medical conditions, with part of payment linked to process metrics, are implemented, and contribute to revenue.
- d. Alternative payment models for certain medical conditions, focused on the appropriateness of care and on reducing costs are implemented and contribute to revenue, but payment is not linked to outcomes or process metrics.
- e. Alternative payment models are not implemented.

(Q16) What are the investments and technologies incorporated related to the value-based health care initiatives?

- a. A digital platform, that integrates inpatient and outpatient data and allows interactions with patients and supports care coordination, is available.
- b. Electronic medical record in all care areas, diagnostic grouping system and a business intelligence (BI) system that integrates clinical, cost and outcomes data are available.
- c. Electronic medical record present in part of the care areas, diagnostic grouping system and a BI system that integrates clinical, cost and outcomes data are available.
- d. An electronic medical record is available but clinical, cost and outcomes data are not integrated into a BI system.
- e. An electronic medical record is not available.

(Q17) Is a Value Management Office (VMO) or similar structure, dedicated to design and implementation of VBHC initiatives, available?

Yes  No

(Q18) Has the organization implemented or is it implementing any VBHC initiatives?

Yes – List initiatives:

No



## **Appendix D. Semi-structured interview guide (translated English version)**

The purpose of this interview is to deepen our understanding of the value-based healthcare initiatives implemented in your organization. The interview will be digitally recorded. I will also take notes during the interview to prevent data loss due to recording failures.

The interview will take 30 minutes. I will ask questions using an interview guide, focused on different areas. Everything that will be said during this interview will be handled carefully and will only be seen by the research group. Results will be presented anonymously and aggregated. Your participation is voluntary, and you may decide to discontinue your participation at any time.

1. Could you confirm your name and role in the organization?
2. What is meant by Value-Based Health Care in your Organization?
3. Regarding your answers to the online questionnaire, I would like to ask for tangible examples of implementation in your organization:

HOW IS CARE DELIVERY ORGANIZED AROUND MEDICAL CONDITIONS?

[Respondent answer to the online survey displayed here is read by the interviewer]

HOW ARE OUTCOMES MEASURED AND ANALYZED?

[Respondent answer to the online survey displayed here is read by the interviewer]

HOW ARE COSTS MEASURED AND ANALYZED AT THE CONDITION LEVEL?

[Respondent answer to the online survey displayed here is read by the interviewer]

HOW IS THE ADOPTION OF NEW PAYMENT MODELS?

[Respondent answer to the online survey displayed here is read by the interviewer]

WHAT ARE THE INVESTMENTS AND TECHNOLOGIES INCORPORATED RELATED TO THE VALUE-BASED HEALTH CARE INITIATIVES?

[Respondent answer to the online survey displayed here is read by the interviewer]

IS A VALUE MANAGEMENT OFFICE (VMO) OR SIMILAR STRUCTURE, DEDICATED TO DESIGN AND IMPLEMENTATION OF VBHC INITIATIVES, AVAILABLE?

[Respondent answer to the online survey displayed here is read by the interviewer]

HAS THE ORGANIZATION IMPLEMENTED OR IS IT IMPLEMENTING ANY VBHC INITIATIVES?

[Respondent answer to the online survey displayed here is read by the interviewer]

(In case initiatives were mentioned, list will be displayed here)

-

-

Please tell us more about the initiative(s) you have mentioned on the online questionnaire. You can also add other initiatives not mentioned previously.

(In case initiatives were not mentioned)

You have not mentioned any VBHC initiative on the online questionnaire. Are there any new initiatives in your organization? If so, could you please tell us more about it?

4. Is there anything else you would like to add?

5. In case your organization is selected, are you willing to authorize a field visit by our team of investigators? If so, in view of the initiatives mentioned, who would be the people with the greatest involvement and who could participate in the interviews during the field visit?

(Name, position, e-mail and/or phone)

We have reached the end of this interview. I would like to thank you for your time and look forward to answering any questions you may have.

## Appendix E. Examples of Definition of Value-Based Health Care in the words of Representatives of the 58 Healthcare Provider Organizations

| What is meant by Value-Based Health Care in your Organization?                                                                                                                                                                                                                                                                                                                                                                                                                                                                                                                                                                                                                                                                                                                                                                                                                                                                                                                                                                                                                                                                                                                                                                                                                                                                                                                                                                                                                                                                                                                                                                                                                                                                                                                                                                                                                                                                                                                                                                                                                                                                                                                                                                                                                                                                                                                            |
|-------------------------------------------------------------------------------------------------------------------------------------------------------------------------------------------------------------------------------------------------------------------------------------------------------------------------------------------------------------------------------------------------------------------------------------------------------------------------------------------------------------------------------------------------------------------------------------------------------------------------------------------------------------------------------------------------------------------------------------------------------------------------------------------------------------------------------------------------------------------------------------------------------------------------------------------------------------------------------------------------------------------------------------------------------------------------------------------------------------------------------------------------------------------------------------------------------------------------------------------------------------------------------------------------------------------------------------------------------------------------------------------------------------------------------------------------------------------------------------------------------------------------------------------------------------------------------------------------------------------------------------------------------------------------------------------------------------------------------------------------------------------------------------------------------------------------------------------------------------------------------------------------------------------------------------------------------------------------------------------------------------------------------------------------------------------------------------------------------------------------------------------------------------------------------------------------------------------------------------------------------------------------------------------------------------------------------------------------------------------------------------------|
| <b>Outcomes (38 references, 23%)</b>                                                                                                                                                                                                                                                                                                                                                                                                                                                                                                                                                                                                                                                                                                                                                                                                                                                                                                                                                                                                                                                                                                                                                                                                                                                                                                                                                                                                                                                                                                                                                                                                                                                                                                                                                                                                                                                                                                                                                                                                                                                                                                                                                                                                                                                                                                                                                      |
| <p><i>"It's monitoring the outcomes of care provided at the institution. How much value we added for the patient - as an imminently surgical hospital, it is not only to monitor the immediate result of the surgery - but to assess complications and how the patient is up to 1 year after the surgery." (I_01)</i></p> <p><i>"We seek to advance in the sense of not only providing patients with this specific context of the health outcome, but we also regard ourselves, in our own reality, as contributing to the patient, to the insurer company and to the social group to which the patient belongs. We try to insert VBHC as an additional contributing element, which outweighs specific clinical outcomes." (I_09)</i></p> <p><i>"It seeks to make the impact of good care on clinical outcomes visible, including the patient's perspective. And it is also an opportunity to improve outcomes and reduce health costs, which is very much in line with our mission here at the hospital, being a reference public hospital in our region". (I_23)</i></p> <p><i>"It's looking at the best outcome for the patient, looking at the most linear process at the lowest possible cost and within outcomes you look at everything from the process, practice and the outcome itself within a more accessible cost and with that we will be able to serve more people in need and serve them better." (I_28)</i></p> <p><i>"When we think of VBHC, we think of Michael Porter, so we think of everything we spend that can generate good clinical outcomes, all the economic effort we make to achieve better clinical outcomes." (I_33)</i></p> <p><i>"It's a concept to be practiced. I would say that a few years ago, at the time of our long-term strategic planning, the term came under consideration but due to lack of maturity, we focused only on starting isolated actions that were in line with the concept of improving outcomes at a lower cost. In essence, that's what happened. As this process is difficult to be practiced in a disciplined way as a set of action plans that are chained in a rational way over time, VBHC evolved into a series of small initiatives in different areas, that although aligned with its global concept, were not linked to a systems approach that would enable us to fully implement the VBHC concept." (I_43)</i></p> |

**Costs (36 references, 22%)**

*"Finding a way to provide a better benefit to cost ratio for our patients, not only to provide an optimal clinical outcome for the patient, but also for the payer, at a reasonable and appropriate cost for the service being provided." (I\_04)*

*"All the actions that we are developing to improve patient outcomes, cost-effectively, and with very good financial results as well." (I\_10)*

*"VBHC seeks to translate health economics, to sell high-impact indicators and be able to seek effective strategies with a better benefit to cost ratio for a target group at risk. The exercise of VBHC consists of obtaining the best clinical outcomes in a safe way but at minimal costs. This is the component that differentiates it in part from Evidence-Based Medicine". (I\_14)*

*"It's what you deliver in the end to each patient and, of course, in balance with costs. Thinking about what we can do best at the lowest cost, whether in terms of clinical outcome or average length of stay, hospital infection, humanization, reception, patient experience, rational use of antibiotics, the complete care chain." (I\_29)*

**Compensation (17 references, 10%)**

*"VBHC is in part opposed to the medicine we have practiced until now, in which patient care, and the payment made by the payer of that care, is given by service provided. VBHC has to do with another concept where care provided is assessed in another way, not in terms of the benefit being granted or not, but in terms of value added to that patient's care chain. It's more about paying-for-results, paying-for-performance or paying-for-appropriate processes than about paying-for-service."(I\_11)*

*"It is simply a care model in which compensation is based on clinical outcomes, in our view, some sustainable models in which all parts of the health chain benefit: patients, providers, suppliers, payers and society as a whole." (I\_22)*

*"The C-suite understands this VBHC movement, but the current focus is more on seeking, learning and testing new payment models and on knowing more about the concept as a whole. From the care delivery perspective, we are still evolving traditional protocols and advancing in the measurement of clinical outcomes." (I\_32)*

*"We understand that VBHC is a global movement, not just a national or local one, both to improve clinical outcomes for the patient and is linked to the compensation model for hospital admissions." (I\_41)*

| <b>Patient experience   perception of care (17 references, 10%)</b>                                                                                                                                                                                                                                                                                                                                                                                                                                                                                                                                                                                                                                                                                                                                                                                                                                                                                                                                                                                                                                                           |
|-------------------------------------------------------------------------------------------------------------------------------------------------------------------------------------------------------------------------------------------------------------------------------------------------------------------------------------------------------------------------------------------------------------------------------------------------------------------------------------------------------------------------------------------------------------------------------------------------------------------------------------------------------------------------------------------------------------------------------------------------------------------------------------------------------------------------------------------------------------------------------------------------------------------------------------------------------------------------------------------------------------------------------------------------------------------------------------------------------------------------------|
| <p><i>"The amount of well-being or satisfaction that the practice of medicine leaves in the patients, in their families, regardless of the result as such, this is what a science like medicine promises, but we know that it has been handled as a commitment to a specific result, achieved through specific activities." (I_07)</i></p> <p><i>"VBHC is what the patient and family perceive in addition to medical care."(I_13)</i></p> <p><i>"I understand that it is what we deliver to the patient in terms of satisfaction, meaning his/her experience counts, so it is to provide resolute and efficient care, with as few adverse events as possible and a good experience for the patient." (I_38)</i></p> <p><i>"We don't see VBHC as just a specific protocol, for example, with ICHOM or another methodology, we understand that it is a series of actions that we have to carry out, such as a well-structured infection control service, thinking about patient-friendly environment settings, everything we can bring to improve patient's care, and his/her experience while in the hospital."(I_54)</i></p> |
| <b>Quality of care &amp; safety (10 references, 6%)</b>                                                                                                                                                                                                                                                                                                                                                                                                                                                                                                                                                                                                                                                                                                                                                                                                                                                                                                                                                                                                                                                                       |
| <p><i>"We have been trying to advance with VBHC for many years and we have adopted the internationally widespread concept that defines value as the ratio between the quality of care we provide, perceived by the patient, adjusted by the costs for the health system to deliver such quality. We believe that we add value each time we manage to improve the quality of care perceived by the patient and we also believe that we add value each time we are more efficient in reducing the costs of the health system."(I_51)</i></p> <p><i>"It is a structure that we are trying to build based on the analysis of outcomes and how we are committed to the quality and safety of care and basing a lot on effectiveness and the analysis and monitoring of clinical outcomes." (I_20, I_21)</i></p>                                                                                                                                                                                                                                                                                                                    |
| <b>Operational &amp; Clinical efficiency (10 references, 6%)</b>                                                                                                                                                                                                                                                                                                                                                                                                                                                                                                                                                                                                                                                                                                                                                                                                                                                                                                                                                                                                                                                              |
| <p><i>"Our main purpose at this moment is to map all the important outcomes of fundamental care processes within the hospital and naturally correlating this with the linked cost. Important hospital areas such as the operating rooms, the surgical volume and the hospitalization of highly complex medical patients, in addition to the dehospitalization of chronic patients, all impact this equation. So this is how we are treating this concept of value within the hospital, understanding that it is essential to reach this</i></p>                                                                                                                                                                                                                                                                                                                                                                                                                                                                                                                                                                               |

*point, this result. We have well defined clinical outcomes of our care processes and naturally we correlate them with all the costs involved in hospital operation.” (I\_34)*

*“It's a relatively new topic and we believe it's associated with adding value to care delivery at each of the stages of the care delivery value chain.” (I\_45)*

#### **Patients' needs, goals & expectations (9 references, 6%)**

*“The concept is related to the clinical care activities that we carry out, which puts patients and their families at the center of care, respecting their values and culture, as well as their spiritual and religious aspects.” (I\_05)*

*“It's directly linked to value for the patient. What the patient understands as a value. What he/she understands as the expected outcome for his/her case. The patient leaves the hospital with the outcome he/she feels as adequate, meaning that he/she comes to us in a situation of risk, problem or health event and finds a solution or a referral here, even when it is not the solution, which he/she deems appropriate for his/her case within the ethics of medical care. This for us is VBHC. If I can anticipate, value-based compensation for us is a second step.” (I\_53)*

#### **Appropriate use of medical resources & waste reduction (7 references, 4%)**

*“We are committed to the proper use of resources, minimizing or eliminating waste and also at the same time seeking a better outcome for the patient. We are advancing in the search for outcomes so that we can increasingly observe outcomes that matter to the patient and not only from the perspective of the hospital.” (I\_19)*

*“It's about delivering what the patient needs, neither more nor less. It is doing the right thing at the right time for that health condition. It has a lot to do with reducing waste and improving value for the patient as well.” (I\_36)*

#### **Reorganization of care delivery (6 references, 4%)**

*“We are starting to look at outcomes delivered by care pathways rather than by a specific procedure or disease. Because we deal with an open medical staff, it's easier for us to start working on this concept using a more direct approach focused on those care pathways where we have specific medical teams and doctors who have a closer relationship with our institution, making it easier for us to work with them. At this first moment, we started to work on the critical patient care pathway, where from admission in*

*the emergency department to discharge, outcomes are monitored to see how the patient evolved within this care pathway. Another step, taken two months ago, was to include a post-discharge visit so that we can measure the success of the hospitalization and if we have done everything we could during the hospital stay and if the patient was discharged in the best clinical condition possible.” (I\_39)*

*“It’s moving away from a fragmented approach, to serve the patient in an integrated way including all relevant spheres of patient care.” (I\_57)*

#### **Competitive positioning (6 references, 4%)**

*“The final objective of VBHC in our institution has a continuous improvement aspect that has a care focus and has a market positioning and competitiveness aspect.”(I\_24)*

*“It is increasingly clear that we will have to work within a model that creates more value for consumers, patients and families, and then, value in terms of delivery of clinical results, patient experience and a lower price... So it's that famous little equation and we always work on this concept of delivering value. It is also clearer that we have to work on this equation if we want to develop new products and more and more the market wants good products with this higher loss ratio faced by health plans, the difficulties in growing our business and all this scenario we live, including the loss of beneficiaries and the unsustainable cost that exist in this sector, the alternative is to develop new products around this value proposition. This is how we define VBHC.” (I\_35)*

#### **Building relationships among stakeholders (3 references, 2%)**

*“It’s a journey that aims at building relationships with all those involved based on the precept of delivering value to the patient. I want to emphasize the journey and involvement of various stakeholders in the process.”(I\_24)*

*“It's the ratio between the quality of care we provide and the outcomes on the most varied fronts, whether clinical care outcomes or the patient's own experience and how much this adds value to us and its relation to cost. This is what we try to practice here, still in the phase of implementing tools that allow us to better reference this but the concept is this: trying to make a good relationship between the 4 bridges that exist between health plans, patients, staff and cost this is our goal.” (I\_44)*

#### **Concept not yet clearly defined (3 references, 2%)**

*“We still don't use this VBHC tool well. We have had a constant discussion about this, but we lack a well-defined process to implement it. We have care pathways and we have started with care pathways because we see that we can offer patients a beginning-to-end solution.” (I\_49)*

*“We are still in the initial phase of this process. We have not started much on this issue so that we can actually advance in the process of measuring Value. I think we've made a lot of progress on measuring costs, but we still haven't managed to analyze costs together with other indicators and across teams.” (I\_03)*

#### **Triple I Quadruple Aim framework (2 references, 1%)**

*“We have adopted a vision of Value based on the Triple Aim concept that has been around for a while and that was fundamental to tread a new path and build our healthcare network, incorporating population health, primary care, and knowing that it is not enough to offer the best treatment for the patient in terms of quality, safety and experience and at an adequate cost if you have not done everything possible to preserve the patient's health and avoid the need of a procedure. Within this triple aim paradigm, we understand that in the dimension between the experience with care and the reduction of the per capita cost, there is a huge space for us to work with VBHC, and that includes new, more creative payment models that in fact deliver value. And I'm putting it that way because I think this is more complex than what is expressed by the Value Equation. Usually, when people discuss about it, they say it's 'result over cost', but the result must include the patient experience and it must include the appropriateness of care as a guide.”(I\_26)*

#### **Technology implementation (2 references, 1%)**

*“It's about incorporating healthcare achievements and advancements versus the costs incurred by the institution to obtain these results.” (I\_08)*



**Appendix F. VBHC Initiatives referred by participating organizations**

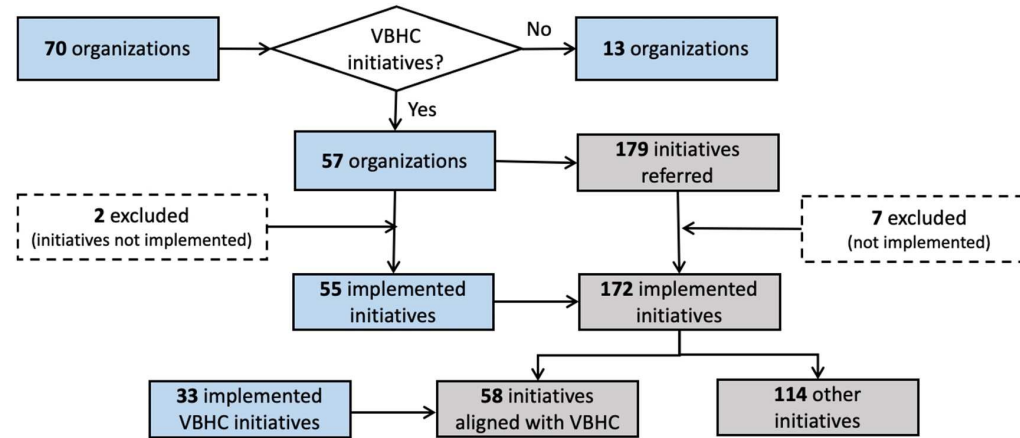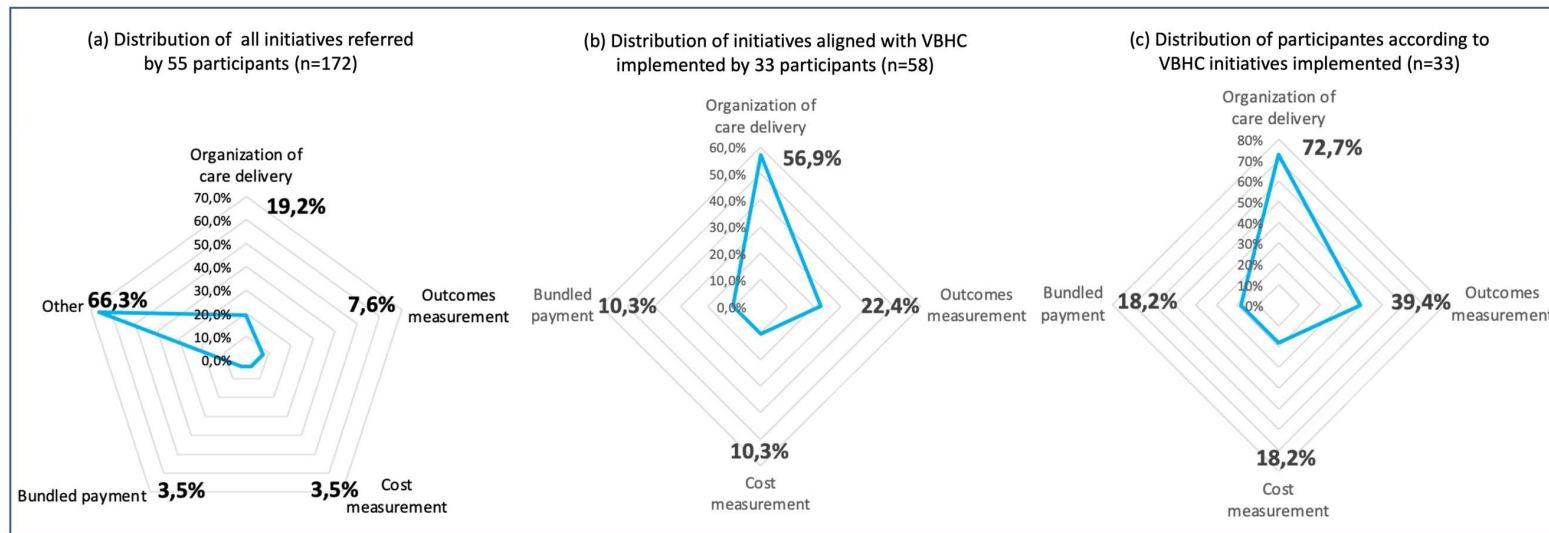

**Appendix G. List of initiatives aligned with the Value Agenda referred by participants**

| <b>Categories</b>             | <b>Initiatives implemented by participants</b>                                                                                                    |
|-------------------------------|---------------------------------------------------------------------------------------------------------------------------------------------------|
| Organization of care delivery | Implementation of an Atrial Fibrillation clinic with critical pathways and measurement of effectiveness, clinical outcomes and experience of care |
| Organization of care delivery | Organization in Medical condition centers: Heart Failure, LVAD, AMI Centers                                                                       |
| Organization of care delivery | Creation of an EPS to offer integrated population health for full care cycles                                                                     |
| Organization of care delivery | Maternity and birth care pathway                                                                                                                  |
| Organization of care delivery | Care model for Rheumatoid arthritis and other rheumatic conditions                                                                                |
| Organization of care delivery | Care pathway for heart valve disease                                                                                                              |
| Organization of care delivery | Transplant Program (Liver, kidney, pancreas, heart, etc)                                                                                          |
| Organization of care delivery | Breast cancer care pathway                                                                                                                        |
| Organization of care delivery | Breast cancer care pathway                                                                                                                        |
| Organization of care delivery | Scoliosis center of excellence                                                                                                                    |
| Organization of care delivery | Autism Spectrum Disorder care pathway                                                                                                             |
| Organization of care delivery | Comprehensive care model for patients with cerebral palsy                                                                                         |
| Organization of care delivery | Kidney Transplant program                                                                                                                         |
| Organization of care delivery | Urinary incontinence and pelvic floor disorders care pathway                                                                                      |
| Organization of care delivery | Optimization of adherence to therapy for pulmonary arterial hypertension using an interactive mobile device and care team approach                |
| Organization of care delivery | Obesity and diabetes Center                                                                                                                       |
| Organization of care delivery | Breast Cancer Center                                                                                                                              |
| Organization of care delivery | Breast Cancer Functional Unit (certified)                                                                                                         |
| Organization of care delivery | Heart failure and transplant functional unit                                                                                                      |
| Organization of care delivery | Organization of care around different tumors using a multidisciplinary approach for full cycle of care and outcomes monitoring                    |
| Organization of care delivery | Hip disorders, low back pain and scoliosis care pathways                                                                                          |

|                               |                                                                                                         |
|-------------------------------|---------------------------------------------------------------------------------------------------------|
| Organization of care delivery | Integrated heart failure program in partnership with a health plan to reduce costs                      |
| Organization of care delivery | Bone marrow transplantation care pathway                                                                |
| Organization of care delivery | Trauma care pathway                                                                                     |
| Organization of care delivery | Heart Failure clinic                                                                                    |
| Organization of care delivery | Implementation of knee arthroplasty care pathway                                                        |
| Organization of care delivery | Implementation of kidney transplant care pathway                                                        |
| Organization of care delivery | Breast cancer center                                                                                    |
| Organization of care delivery | Obesity center                                                                                          |
| Organization of care delivery | Partnership with a long-term care service to provide care coordination and safe discharge               |
| Organization of care delivery | Community-based comprehensive stroke care model                                                         |
| Organization of care delivery | Comprehensive care program for chronic diseases                                                         |
| Organization of care delivery | Implementation of a Bio-Psycho-Social outpatient management program and a Physical conditioning program |
| Outcomes measurement          | Implementation of ICHOM standard sets                                                                   |
| Outcomes measurement          | Implementation of ICHOM standard sets and development of other local standard sets                      |
| Outcomes measurement          | Implementation of ICHOM standard sets                                                                   |
| Outcomes measurement          | Implementation of ICHOM standard sets                                                                   |
| Outcomes measurement          | Implementation of ICHOM standard sets                                                                   |
| Outcomes measurement          | Implementation of ICHOM standard sets                                                                   |
| Outcomes measurement          | Implementation of ICHOM standard sets                                                                   |
| Outcomes measurement          | Implementation of ICHOM standard sets and development of other local standard sets                      |
| Outcomes measurement          | Implementation of ICHOM standard sets                                                                   |
| Outcomes measurement          | Implementation of clinical outcome and volume metrics                                                   |
| Outcomes measurement          | Implementation of ICHOM standard sets                                                                   |
| Outcomes measurement          | 5-year outcomes measurement for stroke patients                                                         |
| Outcomes measurement          | Measurement of validated clinical outcomes, Patient-reported outcomes and social determinants of health |

|                   |                                                                                                                                  |
|-------------------|----------------------------------------------------------------------------------------------------------------------------------|
| Cost measurement  | Costs and outcomes study                                                                                                         |
| Cost measurement  | Multicentric initiative to train and measure TDABC (Bone marrow transplant)                                                      |
| Cost measurement  | Pilot to measure integrated cost of congenital heart disease interventional procedures                                           |
| Cost measurement  | Care pathways with cost measurement                                                                                              |
| Cost measurement  | Cost of stroke for cycles of care                                                                                                |
| Cost measurement  | Cost measurements at the patient and condition level for full cycles of care                                                     |
| Bundle payment    | Implementation of a condition-based bundle payment for endometriosis                                                             |
| Bundle payment    | Bundle payment for knee and hip replacements                                                                                     |
| Bundle payment    | Fixed-price bundles for main procedures and Insurers                                                                             |
| Bundle payment    | Bundle payment for bariatric surgery                                                                                             |
| Bundle payment    | Procedural episodic bundles covering in-hospital complications                                                                   |
| Bundle payment    | Episodic bundles for surgical procedures including 30-days post-discharge complications                                          |
| Other initiatives | Implementation of infection prevention and control quality metrics.                                                              |
| Other initiatives | Pilot project on infection prevention (hand wash, safe administration of iv medication and iv catheter monitoring)               |
| Other initiatives | Length of stay reduction through data and process management                                                                     |
| Other initiatives | Operating room efficiency and patient safety                                                                                     |
| Other initiatives | Implementation of an in-hospital stroke care pathway                                                                             |
| Other initiatives | Implementation of a Value Management Office (VMO)                                                                                |
| Other initiatives | Creation of a portfolio of products based on care pathways (pricing strategy)                                                    |
| Other initiatives | Implementation of a Value Management Office (VMO)                                                                                |
| Other initiatives | Implementation of a Physician compact agreement in partnership with IHI (Institute for Healthcare Improvement)                   |
| Other initiatives | Implementation of an adjustable budget payment model                                                                             |
| Other initiatives | Implementation of risk sharing models with a medical device company (Atrial fibrillation and TAVR) and with a health plan (CABG) |

|                   |                                                                                                                                                |
|-------------------|------------------------------------------------------------------------------------------------------------------------------------------------|
| Other initiatives | Organization of the Medical practice department through the implementation of clinical managed protocols                                       |
| Other initiatives | Participation in the Appropriate Birth Collaborative ('Parto Adequado')                                                                        |
| Other initiatives | Integration between hospital and primary care                                                                                                  |
| Other initiatives | Rational use of high-cost and antimicrobial drugs                                                                                              |
| Other initiatives | Implementation of a Patient experience unit                                                                                                    |
| Other initiatives | Inhospital care pathways for stroke and acute kidney injury                                                                                    |
| Other initiatives | ERAS protocol for surgery procedures                                                                                                           |
| Other initiatives | Homologation of medical supplies and medications based on value                                                                                |
| Other initiatives | Filing system of medical supplies according to procedures                                                                                      |
| Other initiatives | Homologation of practices and procedures                                                                                                       |
| Other initiatives | Launch of a support program for low-income patients in regard to spiritual, social, financing, lodging, food and transportation needs          |
| Other initiatives | Healthy lifestyle incentive programs including a half marathon with over 50,000 participants                                                   |
| Other initiatives | Knowledge transfer to improve community's quality of life through translational research projects focused on improvements in care delivery     |
| Other initiatives | Comprehensive hospital nutritional care program                                                                                                |
| Other initiatives | Care pathway for cancer patients submitted to Radiotherapy patient                                                                             |
| Other initiatives | Research Project on the prevalence of gastric malignant precursor lesions and effect of Helicobacter Pylori eradication for primary prevention |
| Other initiatives | Promotion of a human milk bank network                                                                                                         |
| Other initiatives | Opening of an outpatient specialties center including women's, trauma and heart centers                                                        |
| Other initiatives | Implementation of a dedicated anticoagulation clinic                                                                                           |
| Other initiatives | Sleep laboratory in a hotel                                                                                                                    |
| Other initiatives | Express Scheduled spontaneous demand                                                                                                           |
| Other initiatives | Launch of a patient web portal                                                                                                                 |
| Other initiatives | A pilot to improve diagnosis in breast cancer                                                                                                  |

|                   |                                                                                        |
|-------------------|----------------------------------------------------------------------------------------|
| Other initiatives | ERAS protocol for colorectal, breast and gynecologic cancer                            |
| Other initiatives | Participation in the Appropriate Birth Collaborative ('Parto Adequado')                |
| Other initiatives | Telemetry for ICU LOS reduction                                                        |
| Other initiatives | Optimization of flow and surgical volume                                               |
| Other initiatives | Implementation of a Value Management Office (VMO)                                      |
| Other initiatives | Implementation of a stroke care pathway                                                |
| Other initiatives | Managed surgical procedure packages                                                    |
| Other initiatives | Global daily rates with clinical management                                            |
| Other initiatives | Emergency care packages including services/supplies                                    |
| Other initiatives | Implementation of a Value Management Office (VMO)                                      |
| Other initiatives | Chronic disease inpatient ward                                                         |
| Other initiatives | Case management for breast, colon and prostate cancer                                  |
| Other initiatives | Implementation of a Value Management Office (VMO)                                      |
| Other initiatives | Cost-effectiveness pilot study on community-acquired pneumonia                         |
| Other initiatives | Cost-effectiveness pilot study on left ventricular hypoplasia syndrome                 |
| Other initiatives | Cost-effectiveness pilot study on sepsis.                                              |
| Other initiatives | Implementation of an adjustable budget payment model                                   |
| Other initiatives | Lean methodology for reviewing and adjusting processes.                                |
| Other initiatives | Definition of productivity metrics                                                     |
| Other initiatives | Description of processes based on value flow maps                                      |
| Other initiatives | Adjustments in care model to incorporate and comply with national policies             |
| Other initiatives | Implementation of a global payment model for frail elderly patients with a health plan |
| Other initiatives | Development of physician feedback based on health outcomes                             |
| Other initiatives | Adoption and monitoring of care pathways                                               |
| Other initiatives | Analysis of variability of most frequent procedures                                    |

|                   |                                                                                                                                   |
|-------------------|-----------------------------------------------------------------------------------------------------------------------------------|
| Other initiatives | Creation of specialty committees to standardize and approve medical supplies and technology based on evidence                     |
| Other initiatives | Meetings with medical practice groups to review clinical outcomes and care variation                                              |
| Other initiatives | A model to Integrate care facilities                                                                                              |
| Other initiatives | Build of an integrated care model                                                                                                 |
| Other initiatives | Launch of a humanization policy                                                                                                   |
| Other initiatives | DRG implementation                                                                                                                |
| Other initiatives | Center for pediatric specialized care                                                                                             |
| Other initiatives | Acute bronchiolitis care pathway                                                                                                  |
| Other initiatives | Optimization of care in acute coronary syndromes program, accredited by the ACC                                                   |
| Other initiatives | Optimization of care in hearth failure program, accredited by the ACC                                                             |
| Other initiatives | Optimization of adherence in primary and secondary cardiovascular prevention and rehabilitation                                   |
| Other initiatives | Analysis of 30-day readmission after abdominal oncologic surgeries                                                                |
| Other initiatives | Increase in the number of clinical and care management guidelines                                                                 |
| Other initiatives | Cost management to improve performance (not at the condition level)                                                               |
| Other initiatives | DRG implementation                                                                                                                |
| Other initiatives | Spine appropriateness of care committees                                                                                          |
| Other initiatives | Pay-for-performance with one payer, including a joint coding effort between payer and provider and bonus based on process metrics |
| Other initiatives | Implementation of a Value Management Office (VMO)                                                                                 |
| Other initiatives | Physician Management Program with a focus on technical leadership succession and on patient flows to reduce lenght of stay        |
| Other initiatives | Pediatric Cancer Functional Unit                                                                                                  |
| Other initiatives | Prospective Global Fixed Payments                                                                                                 |
| Other initiatives | Implementation of the Quadruple Aim Model                                                                                         |
| Other initiatives | Pilot of a model to align performance metrics between hospital and health plan                                                    |

|                   |                                                                                                             |
|-------------------|-------------------------------------------------------------------------------------------------------------|
| Other initiatives | Alternative ambulatory care for low-complexity ED (emergency department) patients                           |
| Other initiatives | Service lines for cardiovascular medicine, neurology and digestive tract disorders                          |
| Other initiatives | A mobile device for early detection of heart failure clinical decompensation                                |
| Other initiatives | Outpatient care based on care pathways                                                                      |
| Other initiatives | Evaluation of physician performance using clinical outcomes for periodic feedbacks                          |
| Other initiatives | ERAS protocol for surgery procedures                                                                        |
| Other initiatives | Implementation of na electronic medical record                                                              |
| Other initiatives | Standardization of clinical processes for the entire hospital network                                       |
| Other initiatives | Improvements in communication with patients throughout the care process (pre-, in- and posthospitalization) |
| Other initiatives | Training program on customer satisfaction for our employees combined with monthly measurement of results    |
| Other initiatives | Local and organizational Quality Directory for the hospital network                                         |
| Other initiatives | Single Electronic Medical Record Committee including outpatient and inpatient settings                      |
| Other initiatives | Management of individual clinical risk                                                                      |
| Other initiatives | Optimization of the patient discharge process                                                               |
| Other initiatives | Piloting for DRG implementation                                                                             |
| Other initiatives | Strategy for strengthening clinical governance                                                              |
| Other initiatives | Anticoagulation program                                                                                     |
| Other initiatives | Payment agreement to care for patients with pulmonary hypertension covered by a specific health plan        |
| Other initiatives | Implementation of clinical guidelines                                                                       |
| Other initiatives | Improved care processes based on time and resource optimization                                             |
| Other initiatives | DRG implementation                                                                                          |
| Other initiatives | Acquisition of last generation medical equipments                                                           |
| Other initiatives | Modernization of hospital infrastructure                                                                    |
| Other initiatives | DRG-based payment model with one health plan                                                                |



|                   |                                                                                                       |
|-------------------|-------------------------------------------------------------------------------------------------------|
| Other initiatives | Implementation of an outcomes unit                                                                    |
| Other initiatives | Risk sharing agreement with a medical device company                                                  |
| Other initiatives | Building of key performance indicators dashboards                                                     |
| Other initiatives | Clinicians and employees performance evaluation                                                       |
| Other initiatives | Post-discharge and post-outpatient encounters satisfaction surveys using the net promoter score (NPS) |
| Other initiatives | Establishment of a Clinical governance structure.                                                     |
| Other initiatives | Short hospital stay care model (LOS <5 days)                                                          |
| Other initiatives | Prospective global payments for results achieved                                                      |

LVAD=Left Ventricular Assist Device; AMI=Acute Myocardial infarction; EPS=Entidad Promotora de Salud, Health Promoting Entity; ICHOM=International Consortium for Health Outcomes Measurement; TDABC=Time-Driven Activity Based Costing; TAVR= Transcatheter aortic valve replacement; CABG= Coronary artery bypass graft; ERAS=Enhanced Recovery After Surgery; ICU LOS= Intensive care unit; LOS= Length of stay; ACC= American College of Cardiology; DRG=Diagnosis Related Groups

### Appendix H. Univariate Analysis to Assess the Factors Related to the Implementation of VBHC Initiatives.

| Independent variables                   |         | Participants without VBHC initiatives (n =37) | Participants with VBHC initiatives (n =33) | Total    | p value | OR [95%]               |
|-----------------------------------------|---------|-----------------------------------------------|--------------------------------------------|----------|---------|------------------------|
| Type of organization                    | Public  | 2 (5%)                                        | 5 (15%)                                    | 7 (10%)  | 0,242   | 0,33<br>[0,03 - 2,17]  |
|                                         | Private | 35 (95%)                                      | 28 (85%)                                   | 63 (90%) |         |                        |
| Teaching/University Hospital            | No      | 27 (73%)                                      | 23 (70%)                                   | 50 (71%) | 0,796   | 1,17<br>[0,36 - 3,77]  |
|                                         | Yes     | 10 (27%)                                      | 10 (30%)                                   | 20 (29%) |         |                        |
| For-profit organization                 | No      | 21 (57%)                                      | 24 (73%)                                   | 45 (64%) | 0,214   | 0,5<br>[0,16 - 1,49]   |
|                                         | Yes     | 16 (43%)                                      | 9 (27%)                                    | 25 (36%) |         |                        |
| Specialty hospital                      | No      | 34( 92%)                                      | 24( 73%)                                   | 58( 83%) | 0,054   | 4,16<br>[0,91 - 26,4]  |
|                                         | Yes     | 3( 8%)                                        | 9( 27%)                                    | 12( 17%) |         |                        |
| JCI accreditation                       | No      | 25 (68%)                                      | 18 (55%)                                   | 43 (61%) | 0,328   | 1,72<br>[0,59 - 5,14]  |
|                                         | Yes     | 12 (32%)                                      | 15 (45%)                                   | 27 (39%) |         |                        |
| America Economia Ranking                | No      | 22 (59%)                                      | 21 (64%)                                   | 43 (61%) | 0,808   | 0,84<br>[0,28 - 2,45]  |
|                                         | Yes     | 15 (41%)                                      | 12 (36%)                                   | 27 (39%) |         |                        |
| Number of beds                          | > 200   | 20 (54%)                                      | 19 (58%)                                   | 39 (56%) | 0,813   | 0,87<br>[0,3 - 2,47]   |
|                                         | ≤ 200   | 17 (46%)                                      | 14 (42%)                                   | 31 (44%) |         |                        |
| Organization of care delivery           | No      | 28 (76%)                                      | 8 (24%)                                    | 36 (51%) | < 0,01  | 6,31<br>[2,04 - 21,53] |
|                                         | Yes     | 12 (32%)                                      | 25 (76%)                                   | 37 (53%) |         |                        |
| Outcomes measurement                    | No      | 37 (100%)                                     | 27 (82%)                                   | 64 (91%) | 0,01    | ∞ [1,45 - ∞]           |
|                                         | Yes     | 0 (0%)                                        | 6 (18%)                                    | 6 (9%)   |         |                        |
| ICHOM standard sets implemented         | No      | 37 (100%)                                     | 23 (70%)                                   | 60 (86%) | < 0,01  | ∞ [3,16 - ∞]           |
|                                         | Yes     | 0 (0%)                                        | 10 (30%)                                   | 10 (14%) |         |                        |
| Cost measurement                        | No      | 30 (81%)                                      | 23 (70%)                                   | 53 (76%) | 0,401   | 1,85<br>[0,54 - 6,68]  |
|                                         | Yes     | 7 (19%)                                       | 10 (30%)                                   | 17 (24%) |         |                        |
| Alternative payment models <sup>1</sup> | Não     | 29( 78%)                                      | 15( 45%)                                   | 44( 63%) | 0,01    | 4,25<br>[1,38 - 14,22] |
|                                         | Sim     | 8( 22%)                                       | 18( 55%)                                   | 26( 37%) |         |                        |
| VMO Implemented                         | No      | 33 (89%)                                      | 25 (76%)                                   | 58 (83%) | 0,201   | 2,6 [0,61 - 13,2]      |
|                                         | Yes     | 4 (11%)                                       | 8 (24%)                                    | 12 (17%) |         |                        |

<sup>1</sup>Defined as the adoption of payment modalities different from pure Fee-for-Service or Global Payment.

JCI = Joint Commission International

ICHOM = International Consortium for Health Outcomes Measurement

VMO = Value Management Office

## Appendix I. Challenges to VBHC implementation mentioned in the interviews

### Information: Insufficient Resources (Human and IT) (14)

*“We don't have an electronic medical record, it's a sad reality, we need to make a big investment, but it's still not working.” (I\_04)*

*“We have more setbacks than advances, because we had an electronic system that didn't really help much. Therefore, implementing the new software will take at least two years. Although there is an electronic medical record, it's implemented only in outpatient setting, not in the inpatient area. We still use paper.”(I\_08)*

*“During the rehabilitation process, the patient undergoes various types of assessments and interacts with interdisciplinary teams. The patient is seen by the therapeutic area and by the medical area, so the electronic medical record that we have does not cover the entire rehabilitation process that we offer.”(I\_09)*

*“Insert outcomes collection forms within our electronic medical record is something that we aspire to, it is possible to do, but I don't know if our IT team has the resources and the functionalities to do this.”(I\_26)*

*“Perhaps our biggest Achilles' heel is the manual collection of data, speaking of issues that limit and are indispensable for the office to be able to carry out analyzes in real time, we need an adequate and agile costing system, with quality, these are problems for anyone starting in the area.”(I\_30)*

*“Fee-for-service continues to predominate in our organization. Sometimes I have the impression that payers react as if there is a trap behind the proposal of alternative payment models and I also think that they believe that implementing such models can be very expensive because it requires a series of controls that they don't currently have. In addition, these new models are generally for very specific groups of patients and are likely to require a lot of work for an impact that is considered small, as the vast majority of patients do not fit into these groups. So they don't see it as a way to cut costs. If they had an adequate information system, it would be different.” (I\_51)*

*“For hospitalized patients, we do a very rigorous and manual data collection work in Excel spreadsheets. This is the unfortunate truth, and that's what we use every day during our nursing rounds.”(I\_52)*

**Information: Access & Data Exchange (13)**

*“The data are in our systems, but we have not been successful in extracting the information that translate the quality of care delivered. Another example is the quality satisfaction survey that we send out to patients twice a year, and they give us a score from 1 to 10 and we get a semi-annual evaluation of our results. So I have 8.5 in the first semester and 8.35 in the second semester and I don't know why the quality of our service has dropped. I only have isolated data and I can't relate it to the outcomes. We are in the process of improving data extraction and we believe that after analyzing this data we will be able to measure the value we create.”(I\_11)*

*“We're piloting this and we're trying to assess the doctor's experience of receiving outcomes information before the patient's appointment. At the same time, we know that no matter how successful this initiative may be, it will not be sustainable, due to the volume of patients, if data collection remains manual. The idea is to access information directly from the electronic medical record in real time. We've had a conversation in the past with our electronic medical record provider to bring the PROMs into the system but it hasn't moved forward. The alternative was to use Redcap-like databases to finally automate the collection of questionnaires and the medical record thing got a little stuck, but in the medium and long term I don't see a way out other than the total integration of data.”(I\_17)*

*“The clinical team needs to request permission to the management team to access the quality indicators.”(I\_18)*

*“The greatest difficulty in proposing stronger value-based care models is that our entire cost structure, and that of most hospitals, is linked to a very departmentalized and sectorized vision of cost centers and business units. When in parallel we try to measure the cost of a patient with a heart attack and not the cost of a cardiac ICU, it is an incredible effort. We've been working on this for 2 years and we're getting very close to it because when the formula is developed within the system for one condition, then it becomes easier for another.” (I\_22)*

*“Our greatest difficulty is to bring real-time outcome information to the physician.”(I\_54)*

**Information: Measuring & Reporting Data (14)**

*“In regard to collecting outcomes, we face many difficulties including IT support, for example, and we are not able to collect the patient-reported outcomes because we lack the digital tools that could enable us to do it well. Therefore, we have collected data from the EMR and have used a Redcap database.”(I\_06)*

*“We still collect data manually in order to give feedback to physicians. We are facing this difficult phase of building a solution, but we think that this is the way to go, which is to try to automate this, to build a tool able to link the data throughout the care cycle. We have some estimate based on the frequency of the visits, but again, as the process is manual, it is very prone to errors.”(I\_17)*

*“We have not advanced with regard to the implementation of alternative payment models, especially because we lack a risk adjustment tool like the DRG, for example.”(I\_30)*

*“Currently, we measure a lot of processes metrics. Some outcome metrics such as mortality have been studied, but what is implemented and what I have mapped at the moment is just process such as compliance with admission criteria and readmissions within 30 days.”(I\_35)*

*“Our problem with cost is global in our organization. We have a division by ‘cost center’ in the institution but it's hard for you to know if that really corresponds to the real cost of each service. We hired a consultancy to do this work and I should have some information available later this year. But it is a weakness of the institution itself. You get lost many times even in the database you use for the query. The cost collection is not even structured properly. I was having a conversation with our new billing coordinator who has been here for 48 hours and her concern was “we need to look at cost, because I saw that this is a problem and it is a problem for institutions in general”. (I\_40)*

*“Measuring outcomes in a high-complexity hospital, like ours, brings with it a very different need for data collection in order to adjust the risk. For example, patients referred to us from other outpatient or hospital facilities outside of our network, usually arrive at our hospital in a very different clinical condition.”(I\_53)*

#### **Information: Data reliability & accuracy (9)**

*“We need to make sure the data is reliable. This is difficult because the data entered by the doctors during the consultations is insufficient and that's why we made the decision, about a year and a half or 2 years ago, to hire people dedicated diagnostic coding, and this has helped us to code the DRGs, to find the differences and define what we can do about it. In regard to costs, I don't know the exact nominal value, I can compare existing deviations in relation to the large DRG database, in terms of weight and the estimated length of stay, because logically this will impact the costs of care, what I can't tell you is the exact cost. What we are measuring are the average costs of all cancers and their risk-sharing models, but please note that it is difficult to determine an exact figure as it varies by type of health plan. We compared the costs among three different health plans and the*

*average costs for a certain disease throughout its cycle of care is different between them, so the question to be answered is “am I responsible for these differences?” or is it more likely that the patient’s clinical risk profile at the time of diagnosis is the factor? Or are differences in process agility causing a difference in costs? So, I hope one day I can say that for all patients, regardless of the health insurance they have, “the cost of caring for this patient was this”. But this is not the case, it varies, what we have at the moment are the average costs of care.” (I\_13)*

*“The quality metrics used to adjust global budget shares range from quality and outcome to user’s experience. For example, in myocardial infarction there is a modulation of what is the expected mortality. The trick part here is that there is no clinical risk adjustment. Patient opinion about the quality of care is also poor. It is collected in the emergency room, in the outpatient clinics, and in the ward, it is a large sample and we pay several people to do the survey.”(I\_43)*

*“It has become more difficult to measure the real costs due to the surgery packages and the fee-for-service payment model.”(I\_55)*

#### **Information: Substantial financial investments (4)**

*“The investment we have made in technology is huge, millions of dollars, we have a very large team working on information analysis, which is the medical informatics team, which also had a large investment in human resources.(I\_11)*

*“I believe there is no way to implement any value-based compensation model if you don't have a strong information system. We made an initial investment of almost 12 million dollars and we will have to make investments on an ongoing basis. The size of the investment we are making in Information Technology is about half of what we are investing in medical equipment, that is, if I invest in medical equipment per year, 15 million dollars, surely in Information Systems and Technologies I am investing 7 or 7.5 million dollars.” (I\_13)*

*“Our dream is to integrate all data within a single platform and we are trying to make this financially viable.” (I\_29)*

#### **Stakeholders Buy-in: Doctors (17)**

*“In terms of publishing the outcomes of surgical and medical procedures, last year we published the names of the doctors who stood out the most and it was a bit chaotic. We first need to build a certain culture to move on with more personalized publications. But we have to move forward with it.”(I\_08)*

*“For the last year, we have fully controlled costs through the commitment of all physicians, in such a way that it has become a learning experience.”(I\_12)*

*“Currently doctors are not educated on this and whoever is leading these processes of change is not involving physicians in such discussions.”(I\_26)*

*“We realized that just involving the executives, the executive leadership and even the clinical executive leadership of the hospital is not enough. So we started by identifying clinical leaders who really had a purpose. The cardiology team showed a strong commitment to collaborate with this new model and we started the project with them. The idea is to identify all medical leaders and then listen to their opinions and co-create the new model with them. This is the principle. Once the model is designed, we will then present it to the hospital leadership and the commercial area. A bottom-up movement. Don't start the conversation talking about financial issues, start with the purpose.” (I\_47)*

#### **Stakeholders Buy-in: Healthcare Executives (10)**

*“I believe that the VBHC motto can influence organizational decision to create a system that allows measuring costs by specialty and by clinical condition.” (I\_23)*

*“I can say that the C-suite understands this VBHC movement but the current focus is more on seeking, learning and testing new payment models. My perception is that the C-suite still doesn't fully understand the concept of VBHC as a whole, such as the care delivery part of seeking better outcomes for the main medical conditions.”(I\_32)*

*“We are looking for agreements with a better balance between outcome and cost and I think that from the moment we are able to identify more clearly, especially the issue of outcomes, we can evolve into a more symmetrical system where all these stakeholders will be able to find a common interest and naturally reach a result that we all wish aimed at reducing costs and improving the quality of care.”(I\_34)*

#### **Stakeholders Buy-in: Patient & Community (4)**

*“The driver came from highly motivated healthcare professionals supported by the Patient advocacy association.”(I\_16)*

*“Although we have started almost twelve months ago, patients adherence has been a challenge, and we are working to understand the causes behind this.”(I\_52)*

### **Compensation (20)**

*“We are tied in some way to the agreements we have with the insurers, let's say that with new contracts, we may have the possibility of offering the full cycle of care.”(I\_46)*

*“The care pathway is very well established here, but often a barrier to access is the various forms of contracting with insurers.”(I\_57)*

*“There is an asymmetry of interests among stakeholders such as healthcare professionals, payers, hospital and, of course, the end user and, unfortunately, the payment system that prevails in most countries generates these asymmetric interests.”(I\_34)*

*“Global budget with a penalty-based pay-for-performance is our main payment model. Thirty-seven metrics are evaluated every 3 months to define if a penalty should be applied. It's like, 'If you meet these metrics in the best possible way, you qualify to earn the amount you were supposed to receive, but if you don't, you'll be paid less.' There is only downward adjustment, there is no upward adjustment. That's kind of discouraging, isn't it” (I\_43)*

*“For the last year, we have fully controlled costs through the commitment of all physicians, in such a way that it has become a learning experience. And we had to beg for the health plans to agree on a new compensation model because they preferred to continue to pay by activity.(I\_12)*

### **Fragmented care delivery (17)**

*“There they are seen by our open clinical staff. The doctor makes use of his judgment of the case. There is not a single protocol at the outpatient clinic. In the hospital, the protocol is well defined.”(I\_02)*

*“It's very hard to integrate outpatient, emergency and in-hospital care. We advanced a bit with the inpatient. The integration we have with the primary care network is very broad, so we partnered with the public multidisciplinary home care team program and we are using referrals and counter-referrals but there is still a lot to do because this is very complex as we have more than 50 specialties. In some of them, such as cardiology and internal medicine, we are more advanced but in others we are not there yet.”(I\_03)*



*“We do not have a primary care network linked to the hospital, pre- and post-discharge care is provided in the doctors’ offices in the hospital’s surroundings, and we do not have access to their medical records. Care is fragmented and so once patients are discharged, we lose track of them.” (I\_38)*

*“While at the hospital, the person is fully connected, but as of today and this is one of our challenges, we do not follow the patients more effectively before they get sick, much less after discharge.” (I\_53)*

*“There is an important issue I need to clarify regarding post-acute care, this is not our strongest point, because we are a highly complex hospital and we serve all insurers. In our context, insurers are responsible for patient follow-up, meaning our role is limited to preparing and educating patients for discharge. After discharge we have no contact with them, they return to their insurer’s low-complexity network, as we only serve medium and high complexity cases”. (I\_58)*

### **Competitive positioning (3)**

*“It is also clearer that we have to work on this equation if we want to develop new products and more and more the market wants good products with this higher loss ratio faced by health plans, the difficulties in growing our business and all this scenario we live, including the loss of beneficiaries and the unsustainable cost that exist in this sector, the alternative is to develop new products around this value proposition.”(I\_35)*

*“We understand that current payment and care delivery models we offer to the market today are not ideal. And we understand that the patient increasingly demands more of it, requests more that we deliver value on top of what is being paid to us, and we understand that the study regarding the delivery of value to the patient is a something that is going on, it is something difficult to do, difficult to find the solution for this, but we understand that this is the delivery of value to the patient.”(I\_37)*

### **Governance (6)**

*“Hospital governance is split between executives and professors that serve as department heads and there is a dispute that makes it difficult to align the two parts. Interestingly, hospital executives are pushing for change while department heads are actually slowing down the process, contrary to what one would expect.”(I\_43)*

*“The executive board, even though it is composed of physicians, is still guided by the logic of volume and financial results instead of being guided by the logic of care reengineering to reach that financial result. It’s a dilemma.”(I\_47)*

*“I believe that the VBHC motto can influence organizational decision to create a system that allows measuring costs by specialty and by clinical condition.”(I\_23)*

**Regulation (3)**

*“The way healthcare regulation is structured in my country, which implies that each patient, after an outpatient or inpatient care, must receive a detailed bill with a list of all their expenses such as supplies, medications, consultations, diagnostic tests, etc. it has turned the regulation itself in an obstacle to moving forward with other payment models linked to longer and more integrated care cycles. We all need to move forward together, providers, payers and regulators.(I\_06)*

*“Our current report with the local government is all based on the costs of services provided and that will have to continue being measured.”(I\_23)*

**Volume (4)**

*“What we did was, based on these costs, reach a consensus with the health plan and ensure that the clinic has a volume of patients.”(I\_09)*

*“Some care pathways are well organized such as the cardiac surgery pathway but our volume is very low to date. In total hip and knee arthroplasty and breast cancer, care pathways are designed both for public projects and to extend to private health plans but the problem is that we also don't have a very significant volume of patients at this moment.”(I\_18)*

*“They, for example, are not mobilized around myocardial infarction, but perhaps they would be around heart failure that involves a higher volume of patients.” (I\_51)*
